# Supplementary material for: Refinement of a published gene-physical activity interaction impacting HDL-cholesterol: role of sex and lipoprotein subfractions
Source: PubMed Central journal article supplement (PMC10836120; doi:10.1101/2024.01.23.24301689), 2024-01-24
Supplement: NIHPP2024.01.23.24301689v1-supplement-2.pdf [file NIHPP2024.01.23.24301689v1-supplement-2.pdf]

## Supplementary Figures

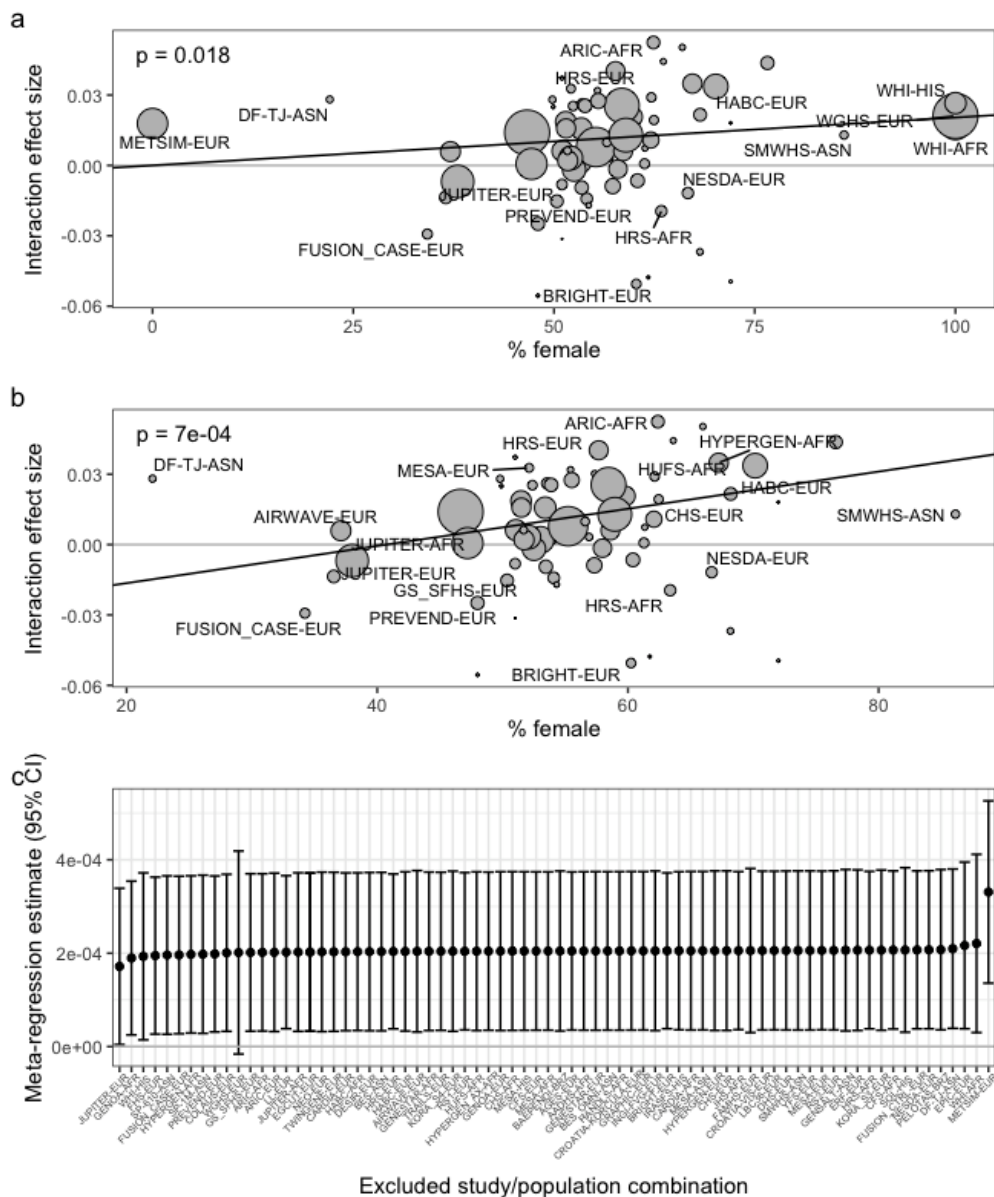

**Supplementary Figure S1:** Bubble plot describing the meta-regression of interaction summary statistics from Kilpeläinen et al. a) Interaction effect sizes from each cohort are plotted against the corresponding sex proportions for the primary meta-regression. Bubble size is proportional to the inverse variance of the interaction effect estimate. Study labels are shown for studies with  $N > 1,000$ . b) As in (a), but excluding all single-sex studies. c) Leave-one-out sensitivity analysis plots show meta-regression estimates and confidence intervals after excluding each study-population combination.

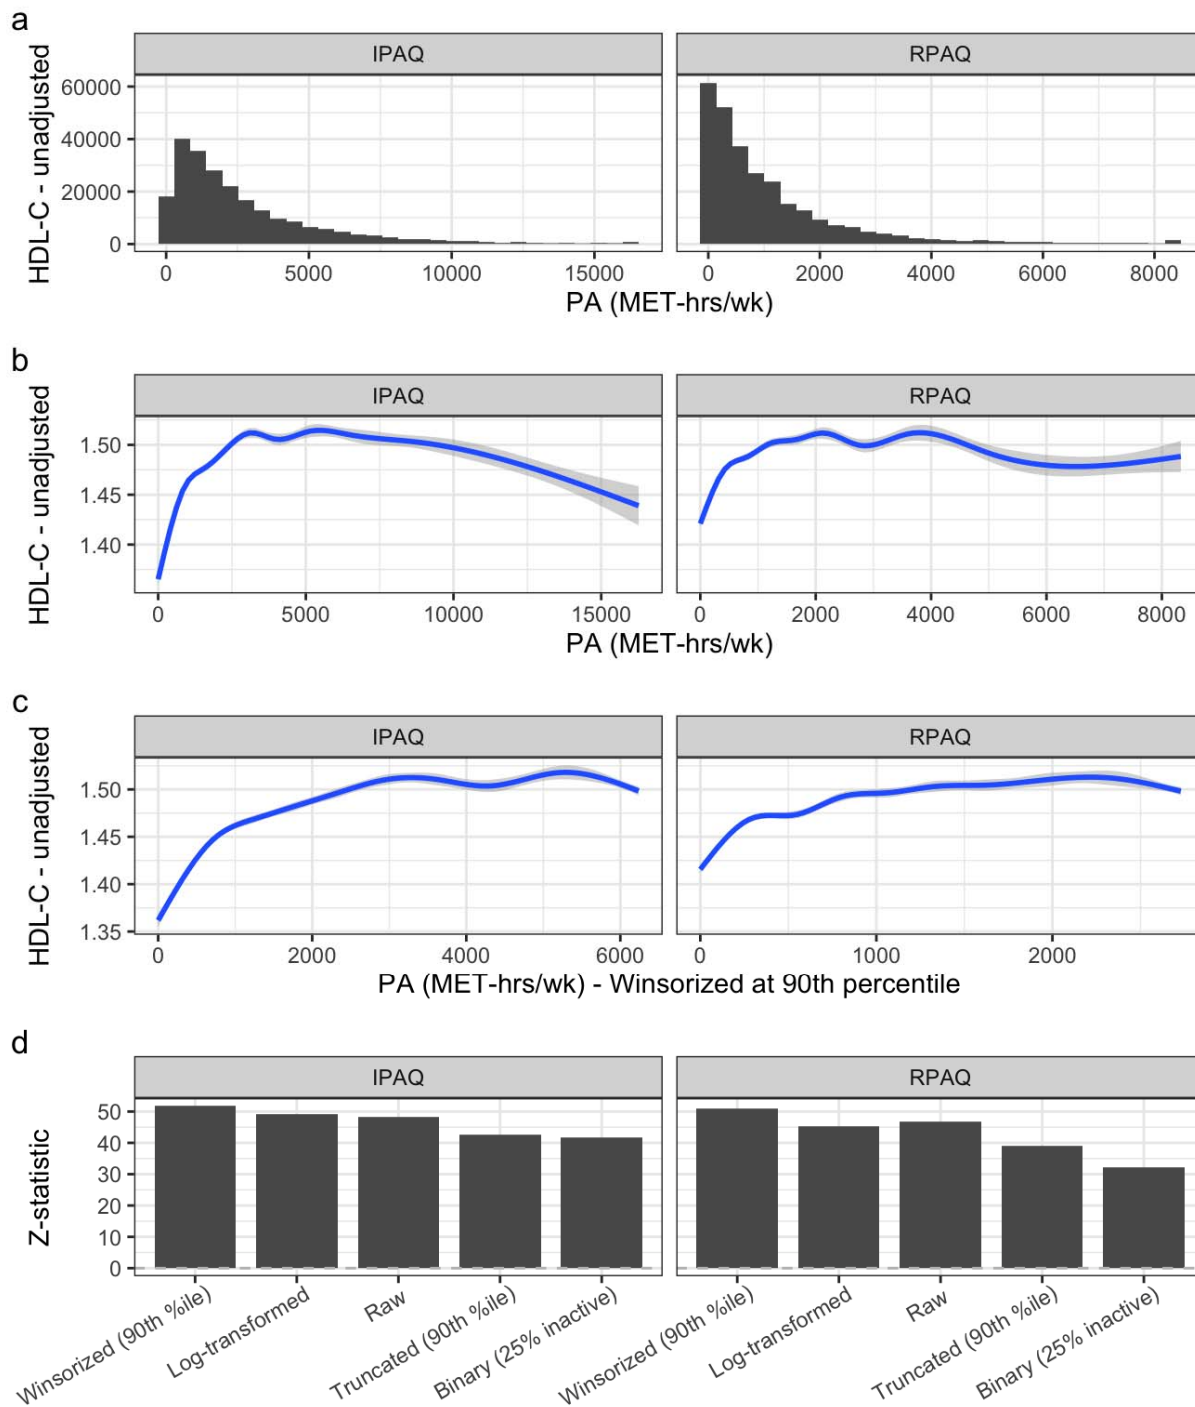

**Supplementary Figure S2: PA-HDL-C main effects in UKB.** a) Histogram of PA measured using questions based on the IPAQ (left) or RPAQ (right) questionnaires. b) Shrunken cubic spline fits of the relationship between PA and unadjusted mean HDL-C, with shadows corresponding to 95% CIs. c) As in (b), but using PA distributions winsorized at the 90<sup>th</sup> percentile. d) Adjusted main effect z-statistics according to PA transformation.

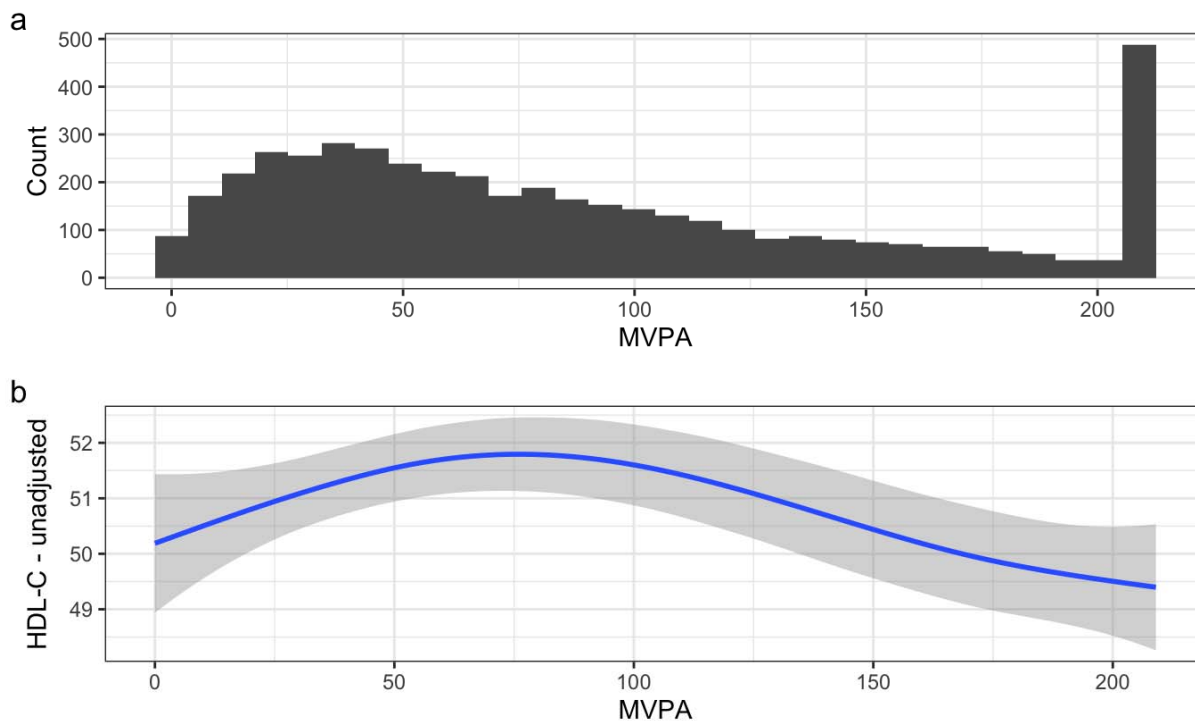

**Supplementary Figure S3: PA-HDL-C main effects in MESA.** a) Histogram of questionnaire-based moderate-to-vigorous PA estimates. b) Shrunken cubic spline fit of the relationship between PA and unadjusted mean HDL-C, with shadows corresponding to 95% CIs.

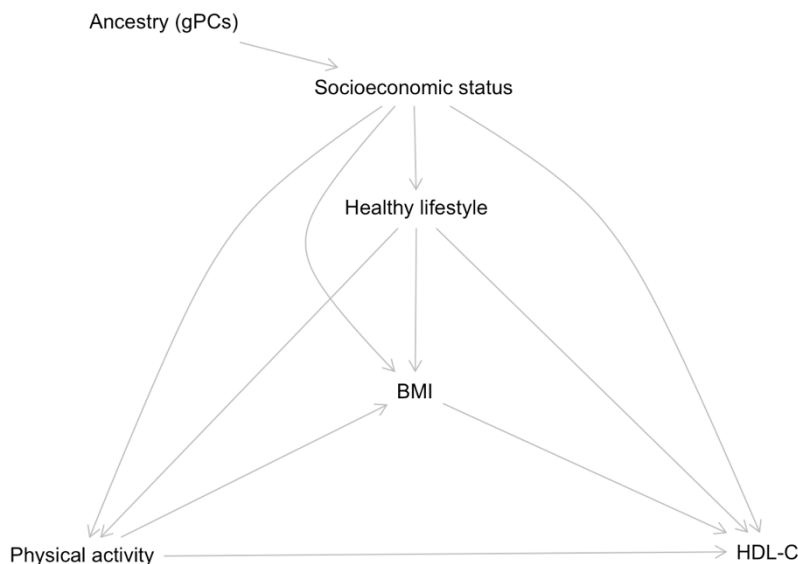

**Supplementary Figure S4: Directed acyclic graph informing covariate selection based on PA-HDL-C main effect.**
